# Supplementary material
Source: PubMed Central journal article supplement (PMC8159908)

Extended Data Figure 2a

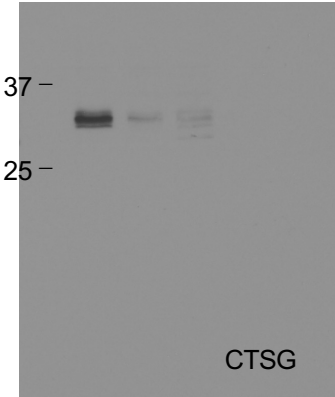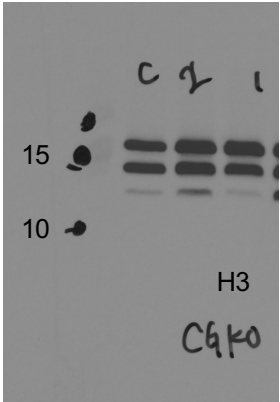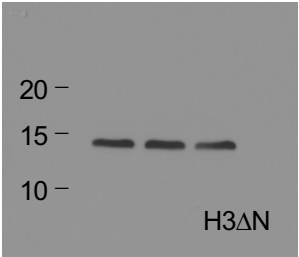

Extended Data Figure 2b

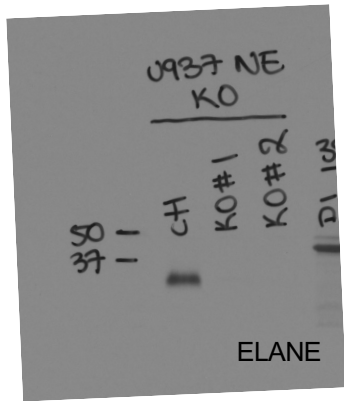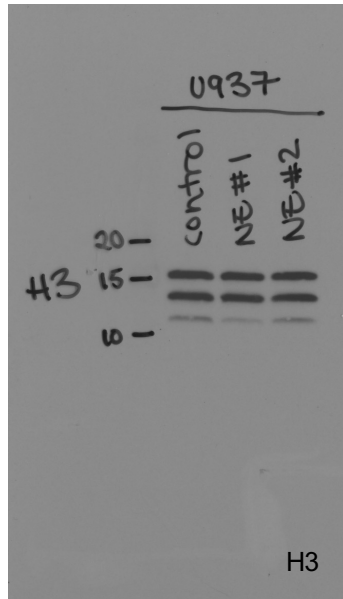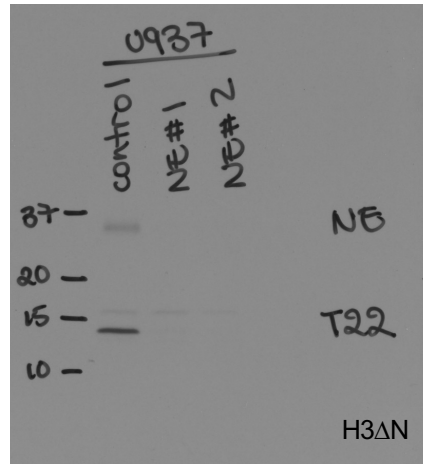

Extended Data Figure 2c

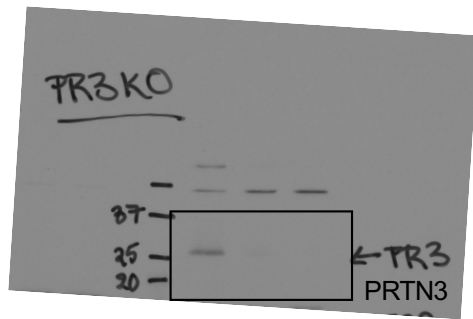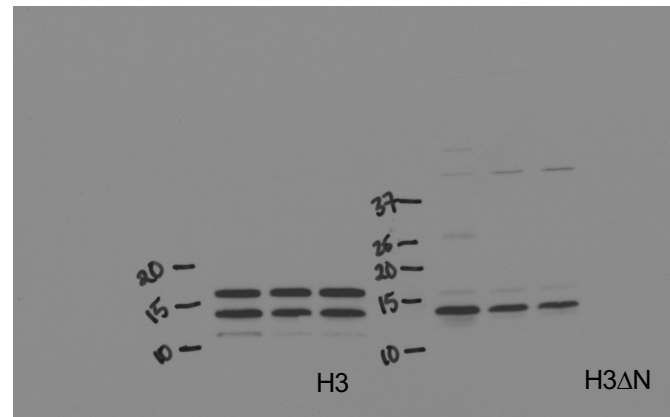

Extended Data Figure 2d

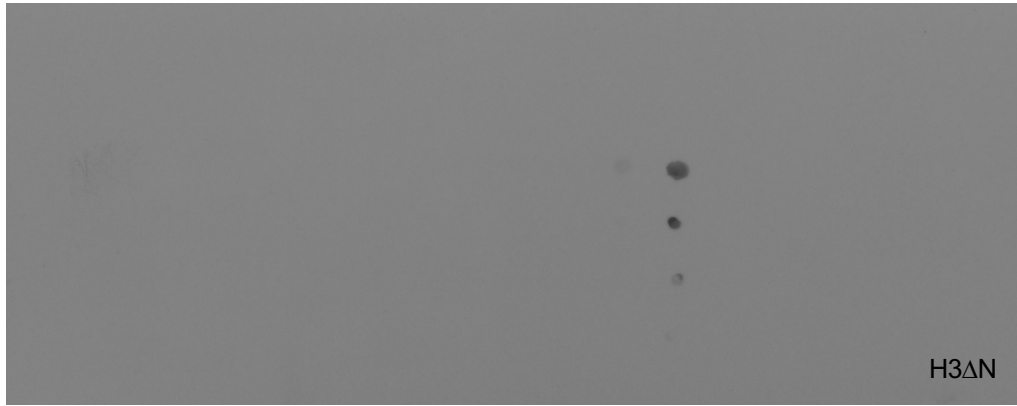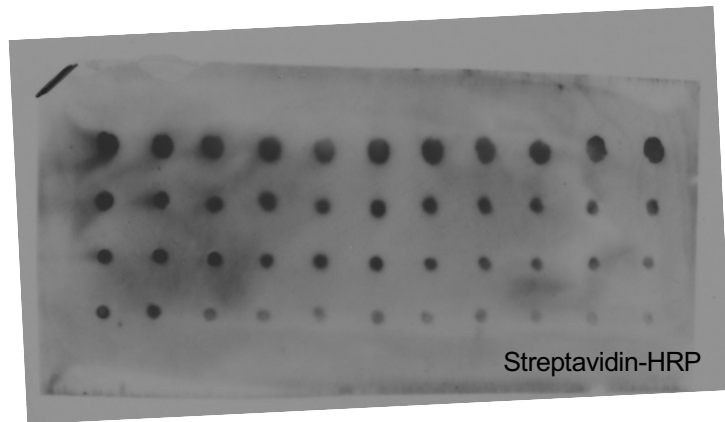

Extended Data Figure 2e

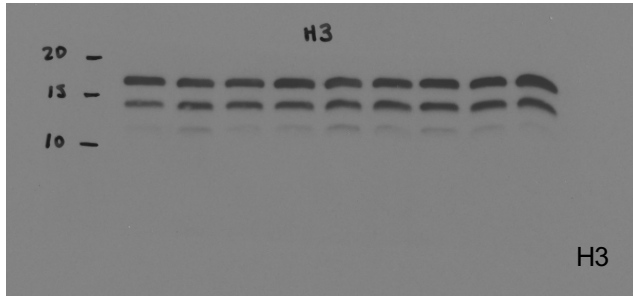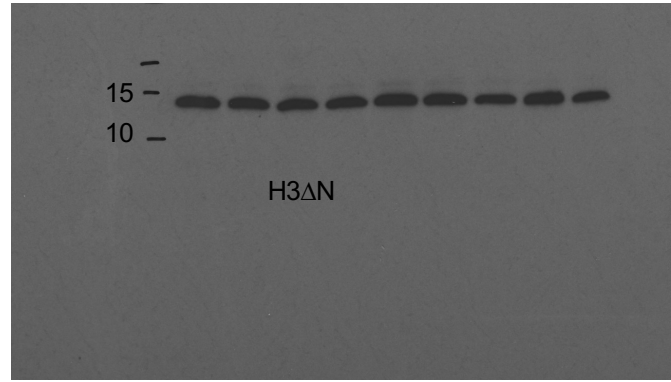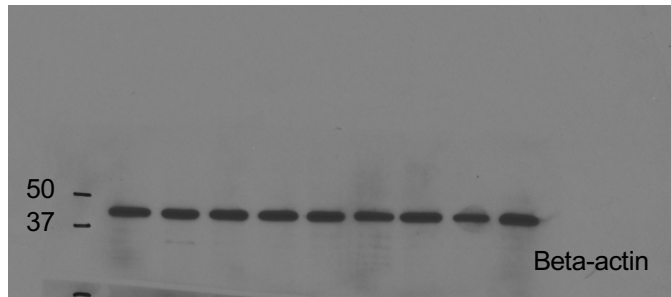

Extended Data Figure 2j

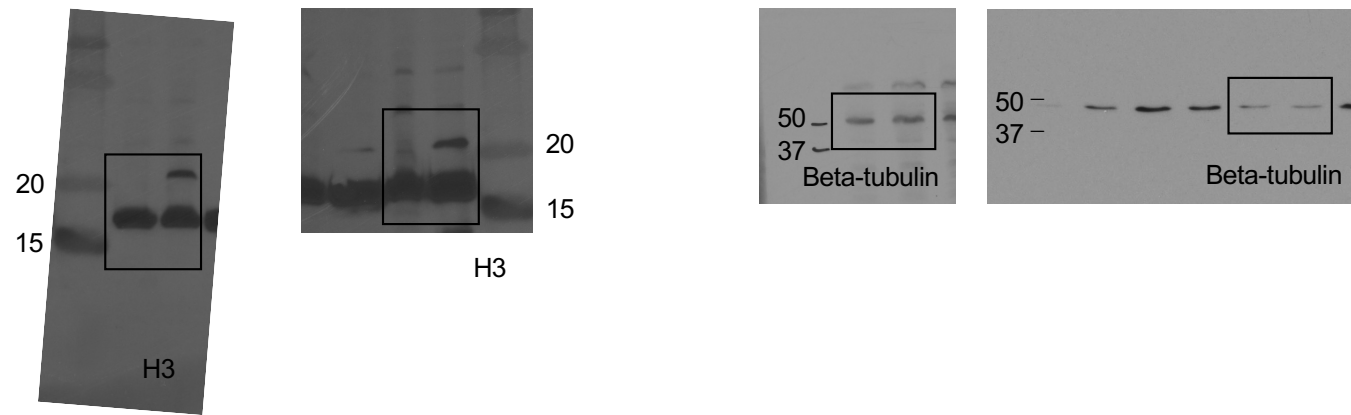

Extended Data Figure 2k

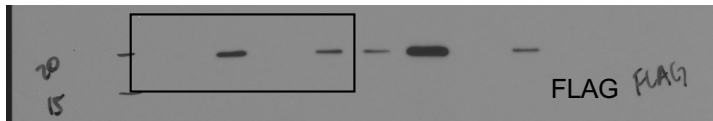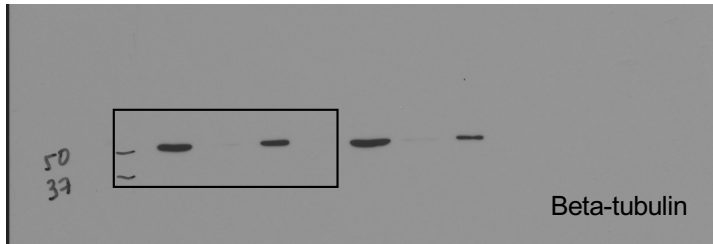

Extended Data Figure 2m

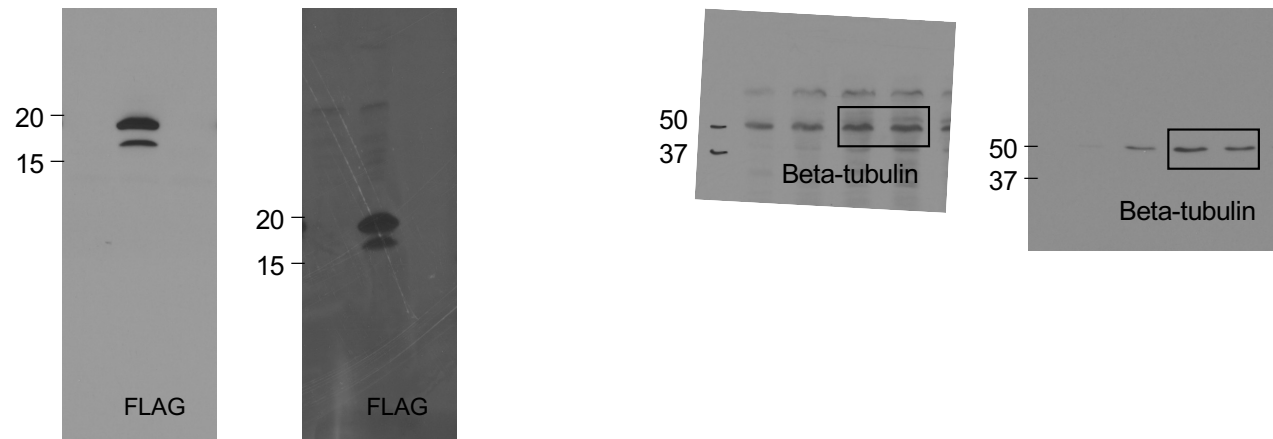

Supplement: NIHMS1690831-supplement-1690831_SD_ED_Fig2.pdf [file NIHMS1690831-supplement-1690831_SD_ED_Fig2.pdf]
