# Supplementary material
Source: PubMed Central journal article supplement (PMC8159908)

Extended Data Figure 3c

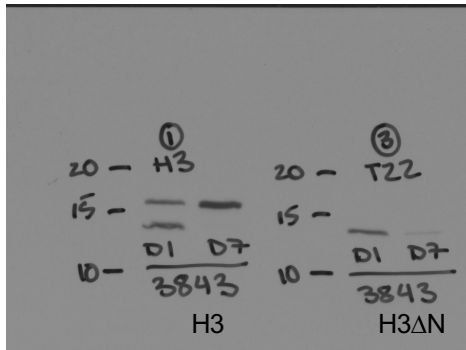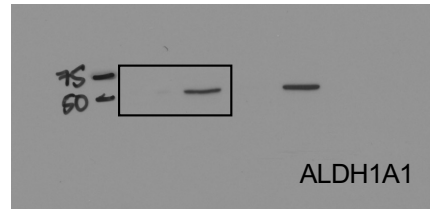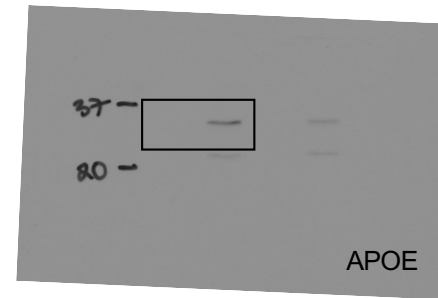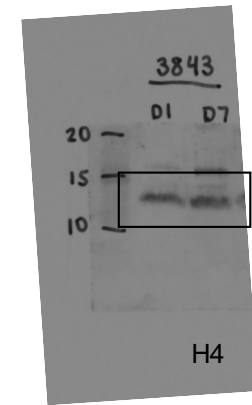

Extended Data Figure 3e

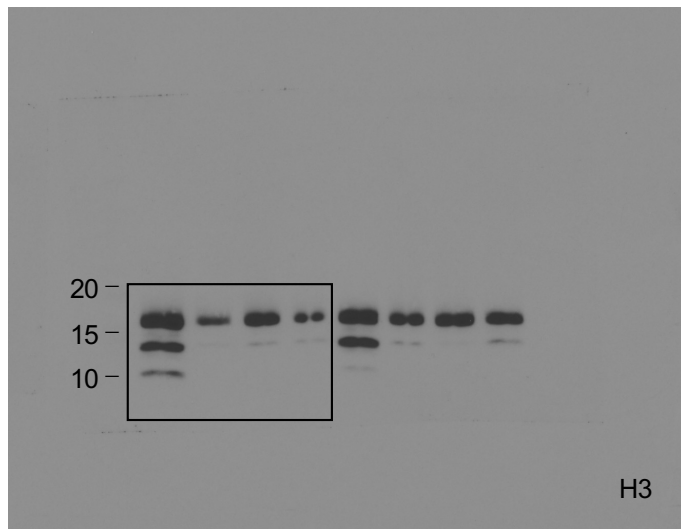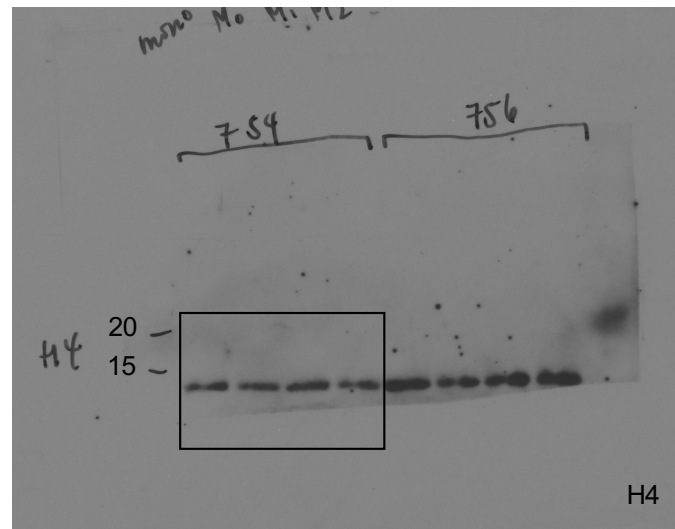

Extended Data Figure 3f

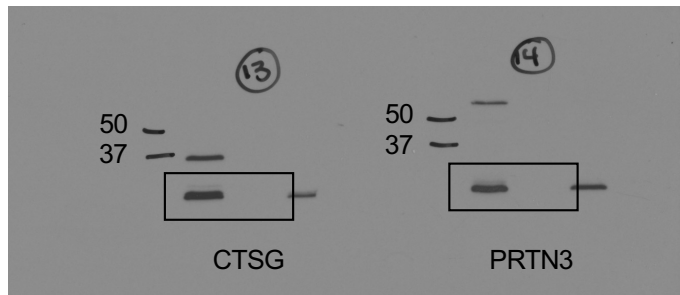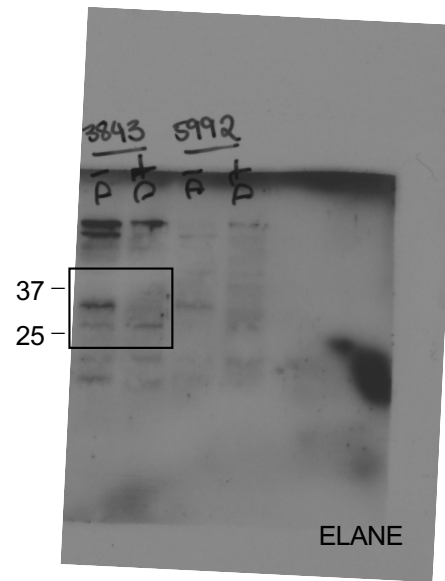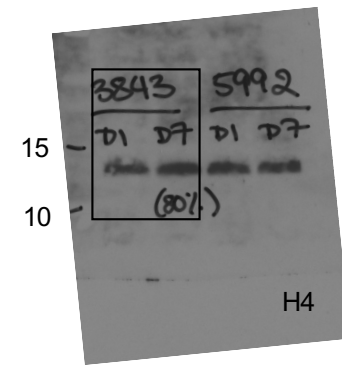

Extended Data Figure 3h

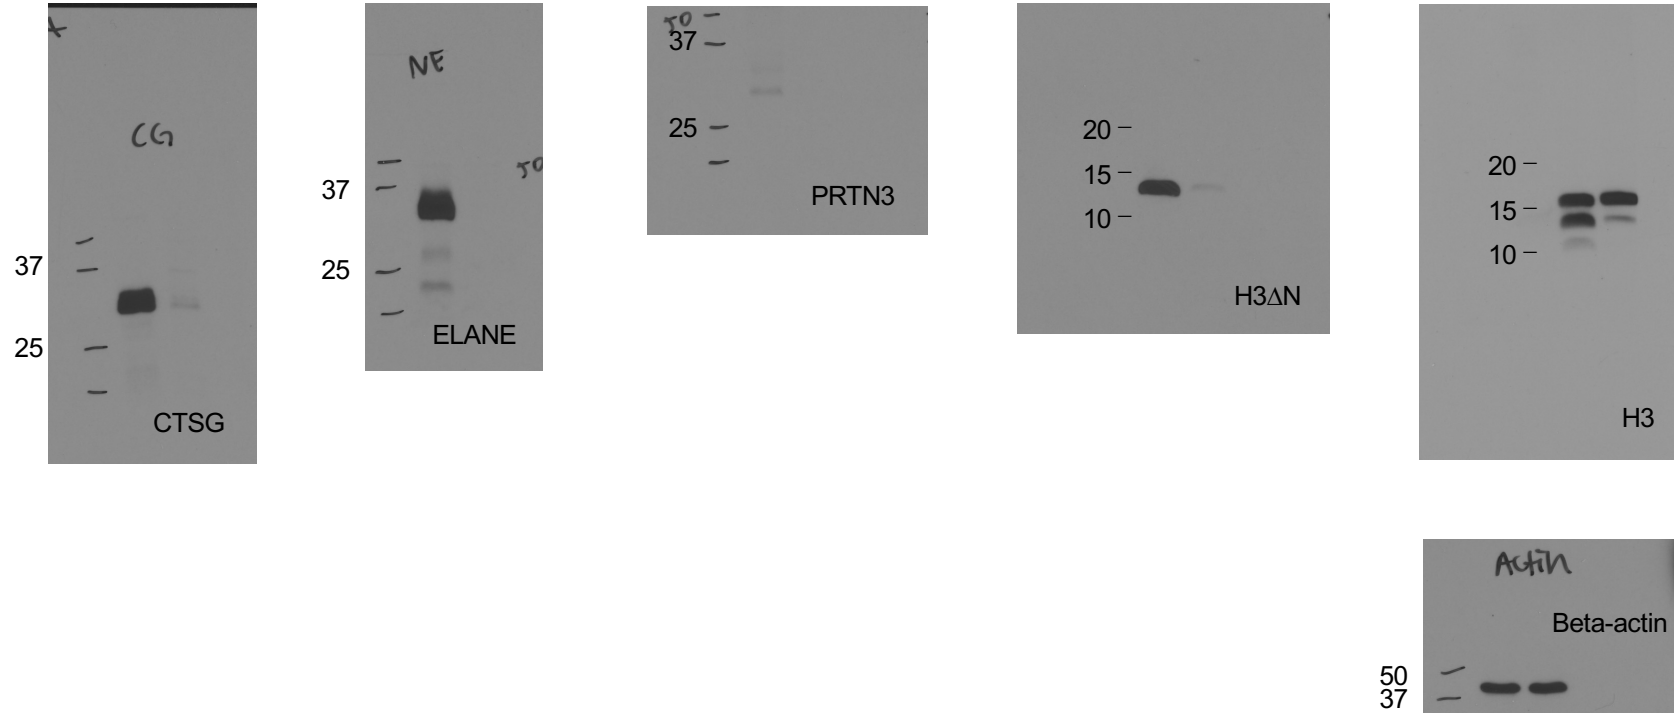

Extended Data Figure 3i

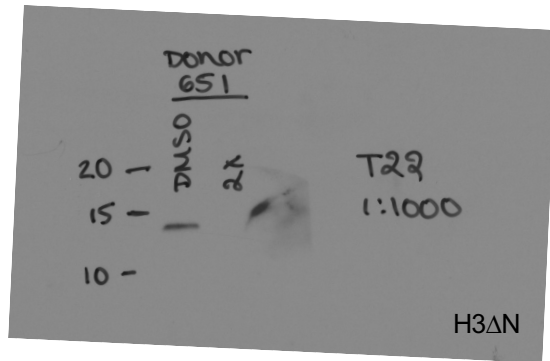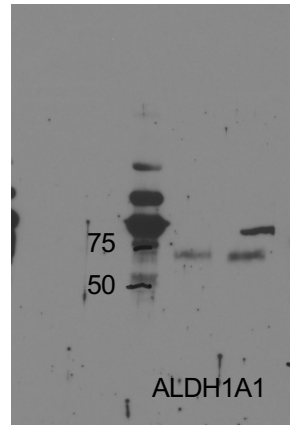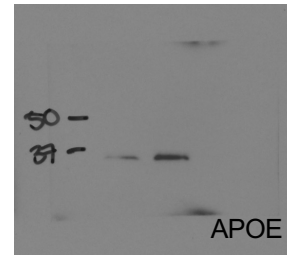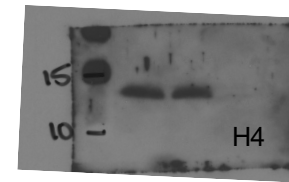

Extended Data Figure 3k

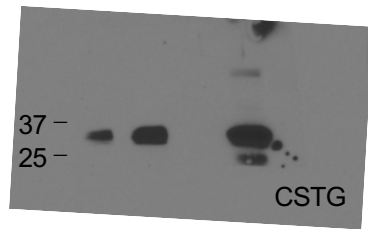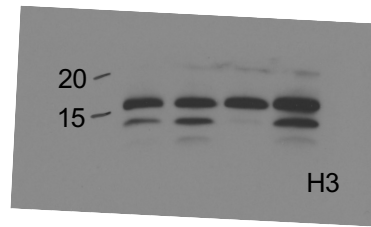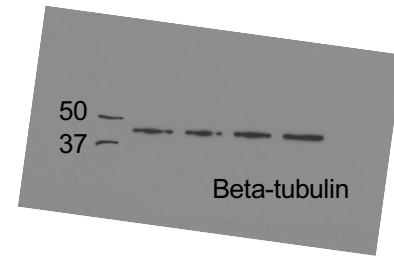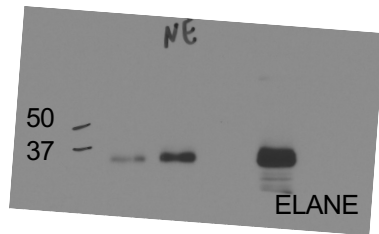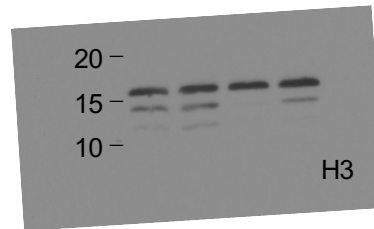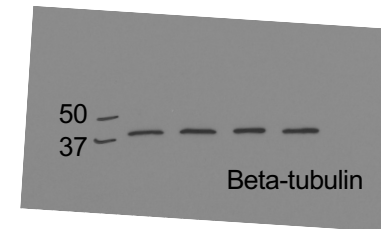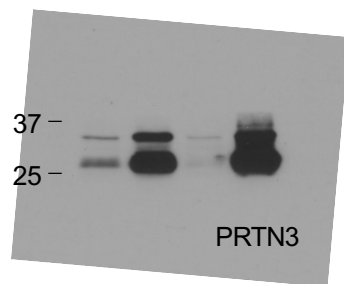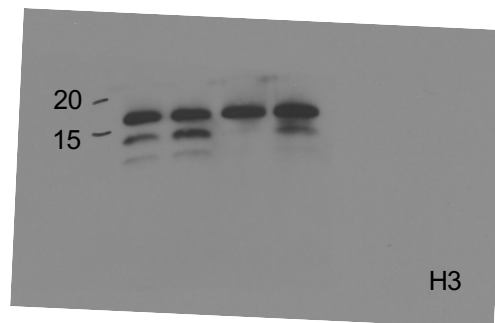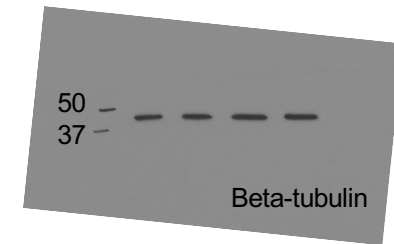

Supplement: NIHMS1690831-supplement-1690831_SD_ED_Fig3.pdf [file NIHMS1690831-supplement-1690831_SD_ED_Fig3.pdf]
