# Supplementary material
Source: PubMed Central journal article supplement (PMC8159908)

Extended Data Figure 1d

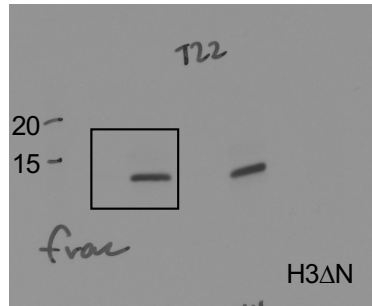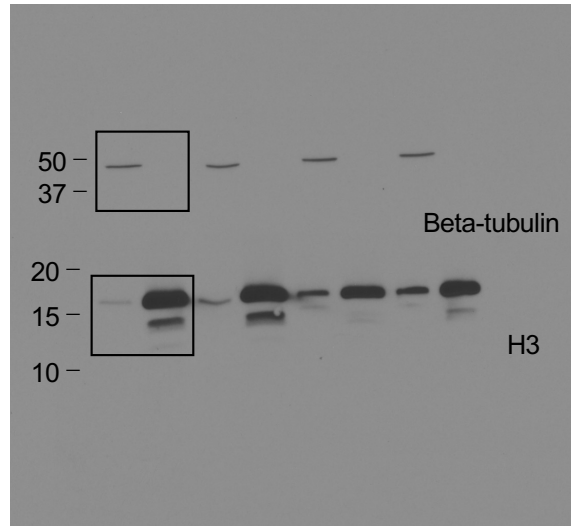

Extended Data Figure 1e

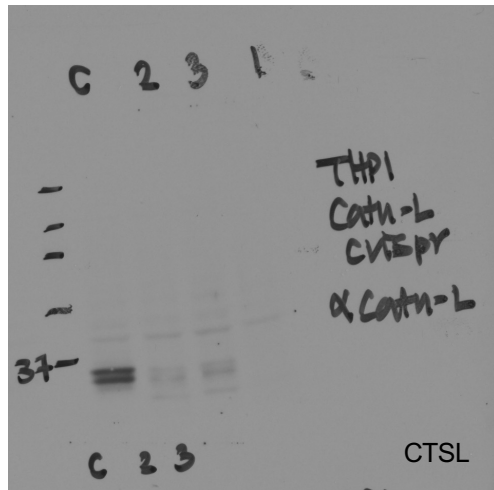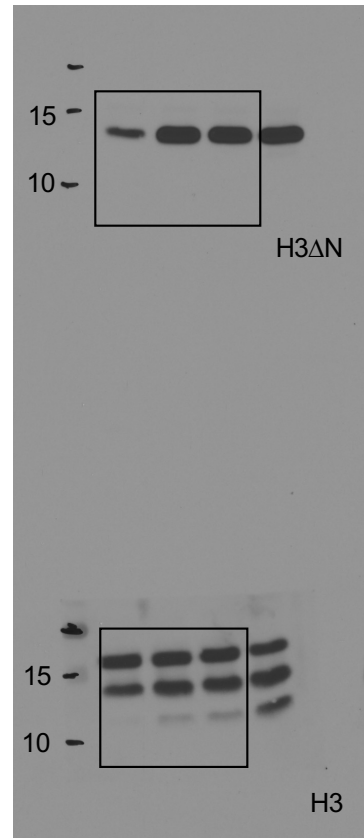

Extended Data Figure 1f

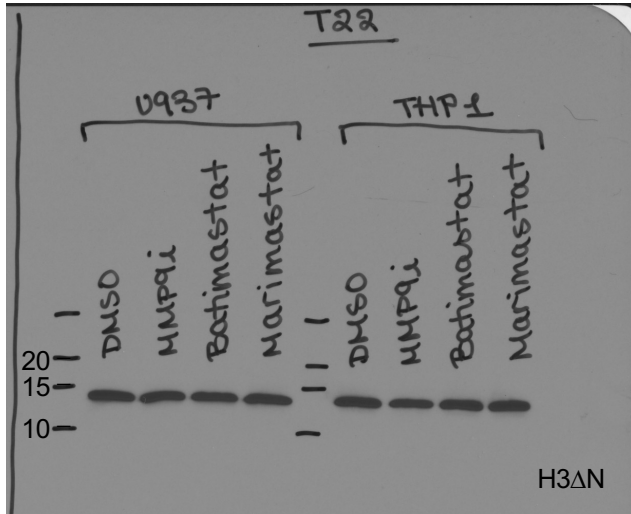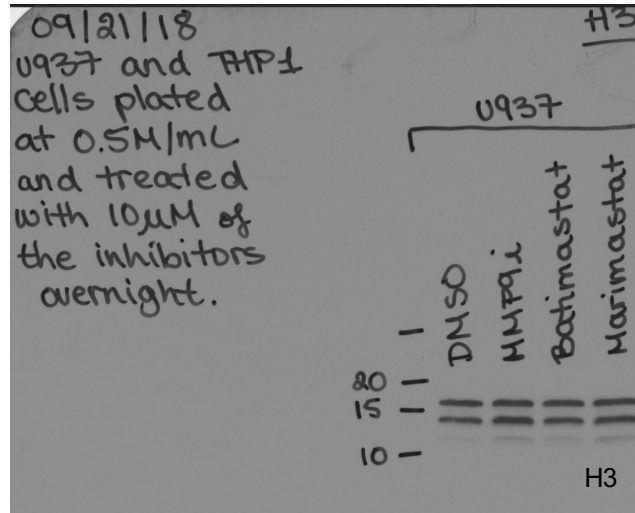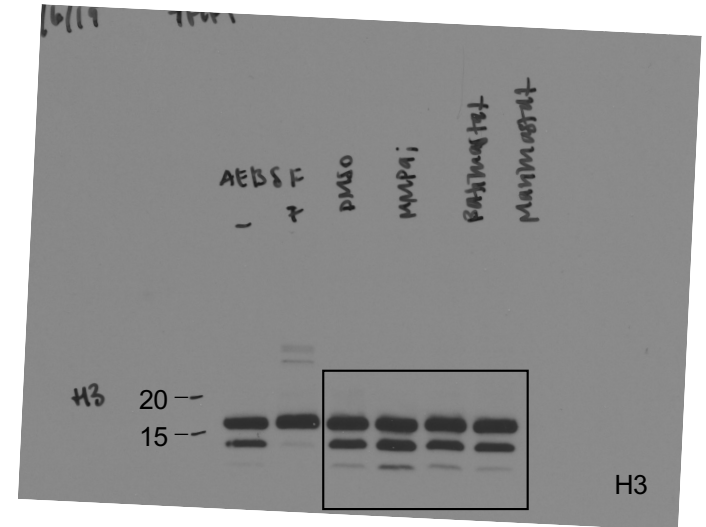

Extended Data Figure 1g

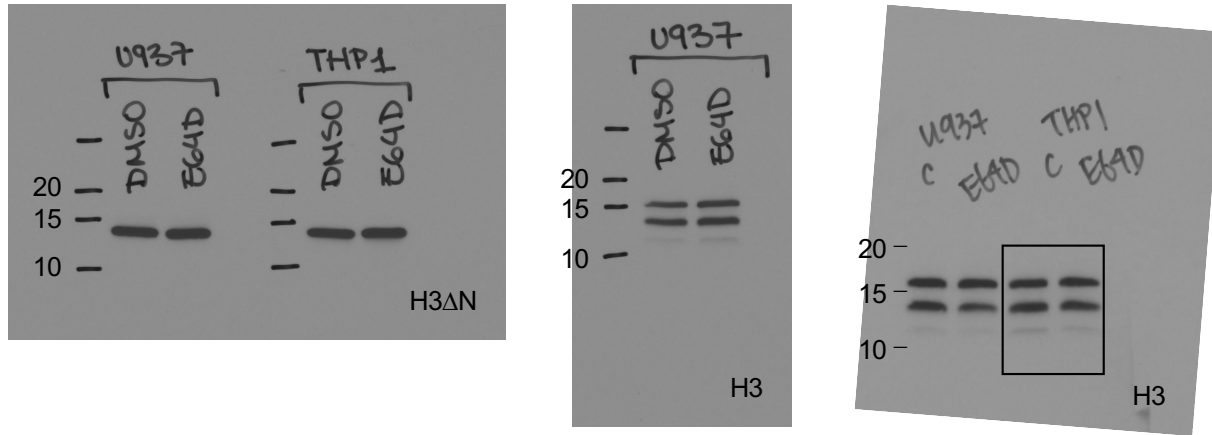

Extended Data Figure 1h

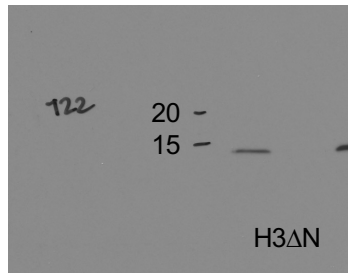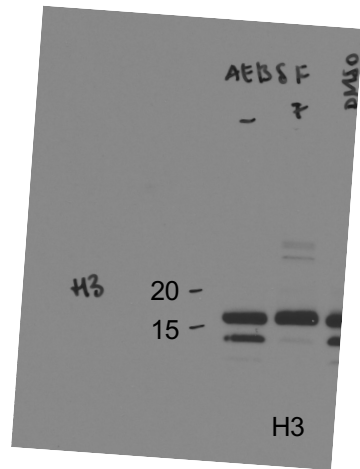

Extended Data Figure 1i

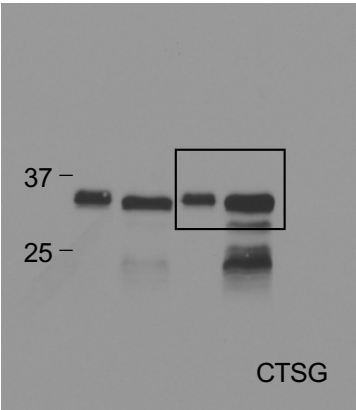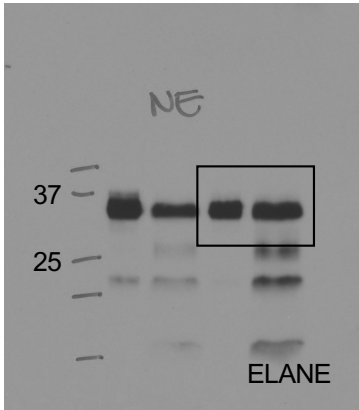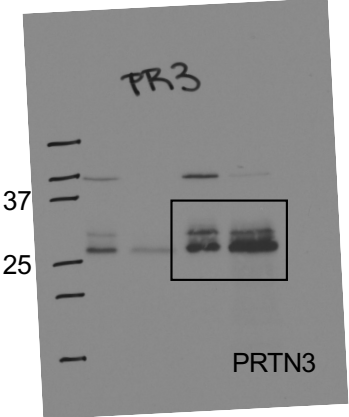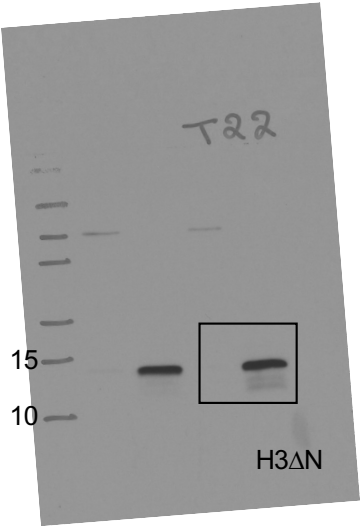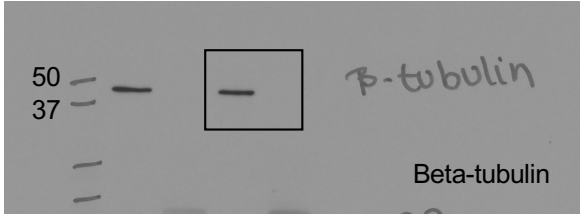

Extended Data Figure 1j

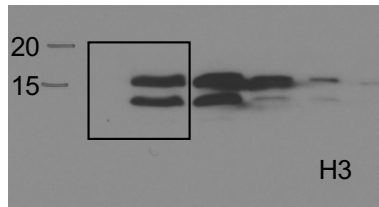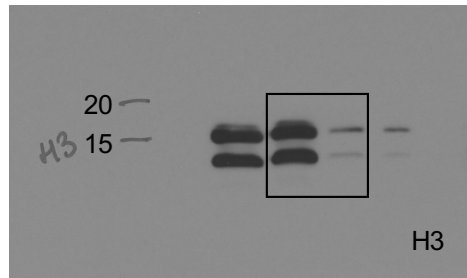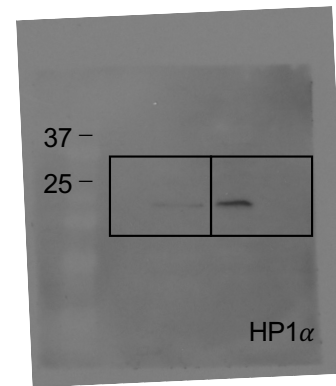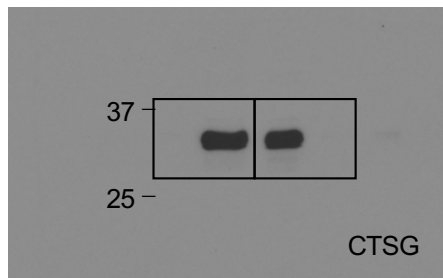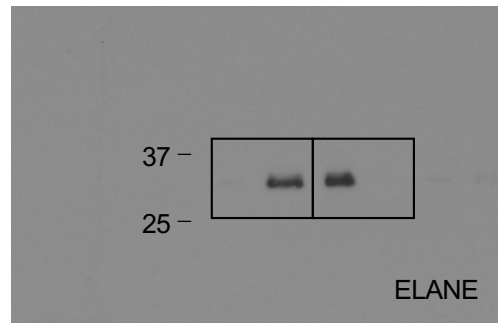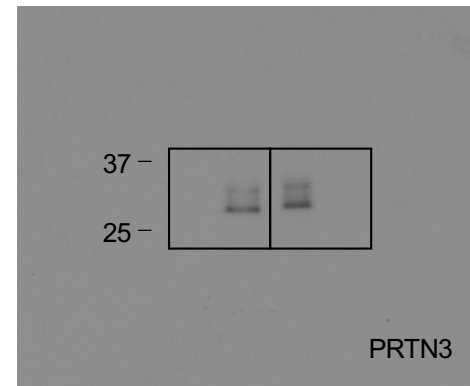

Extended Data Figure 11

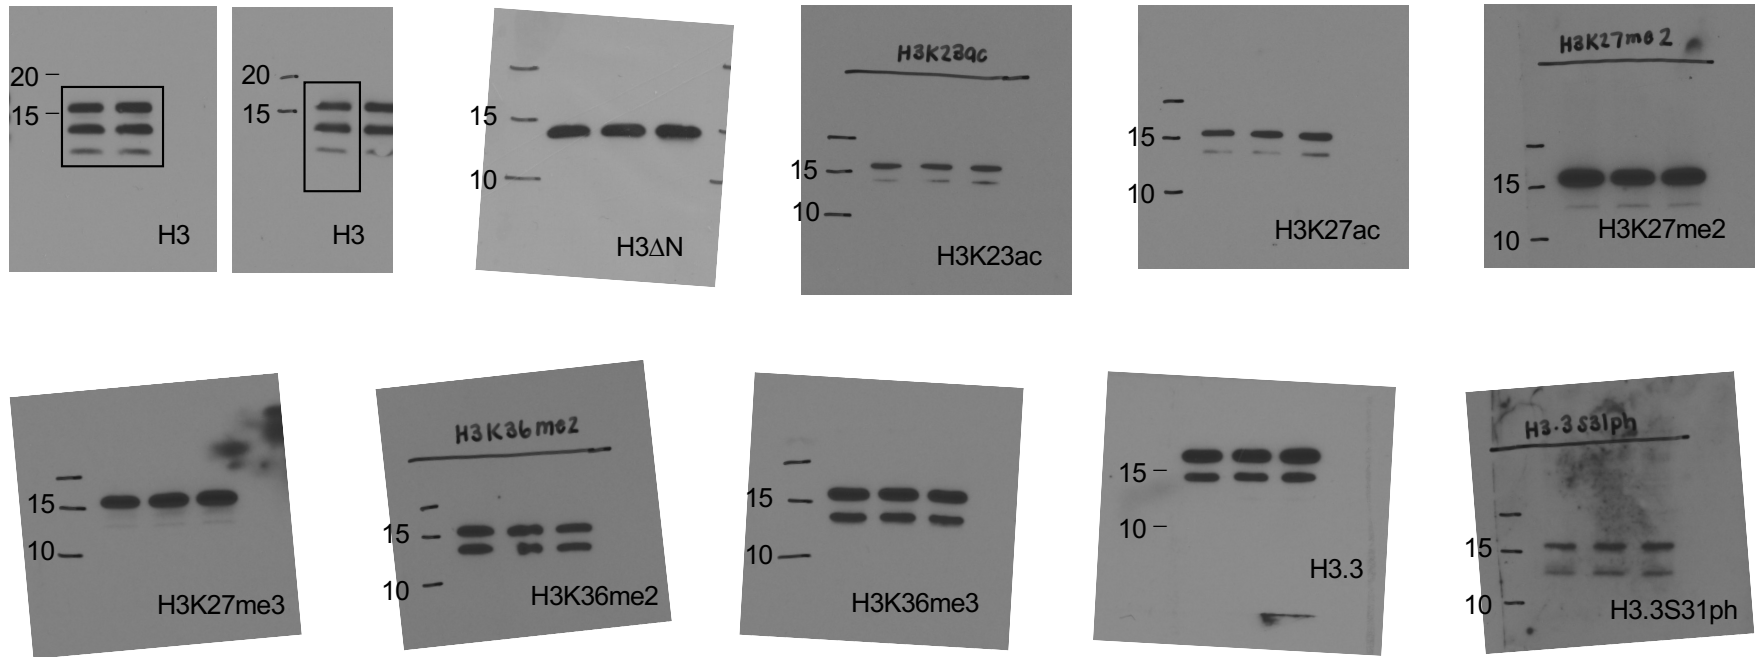



Extended Data Figure 1m

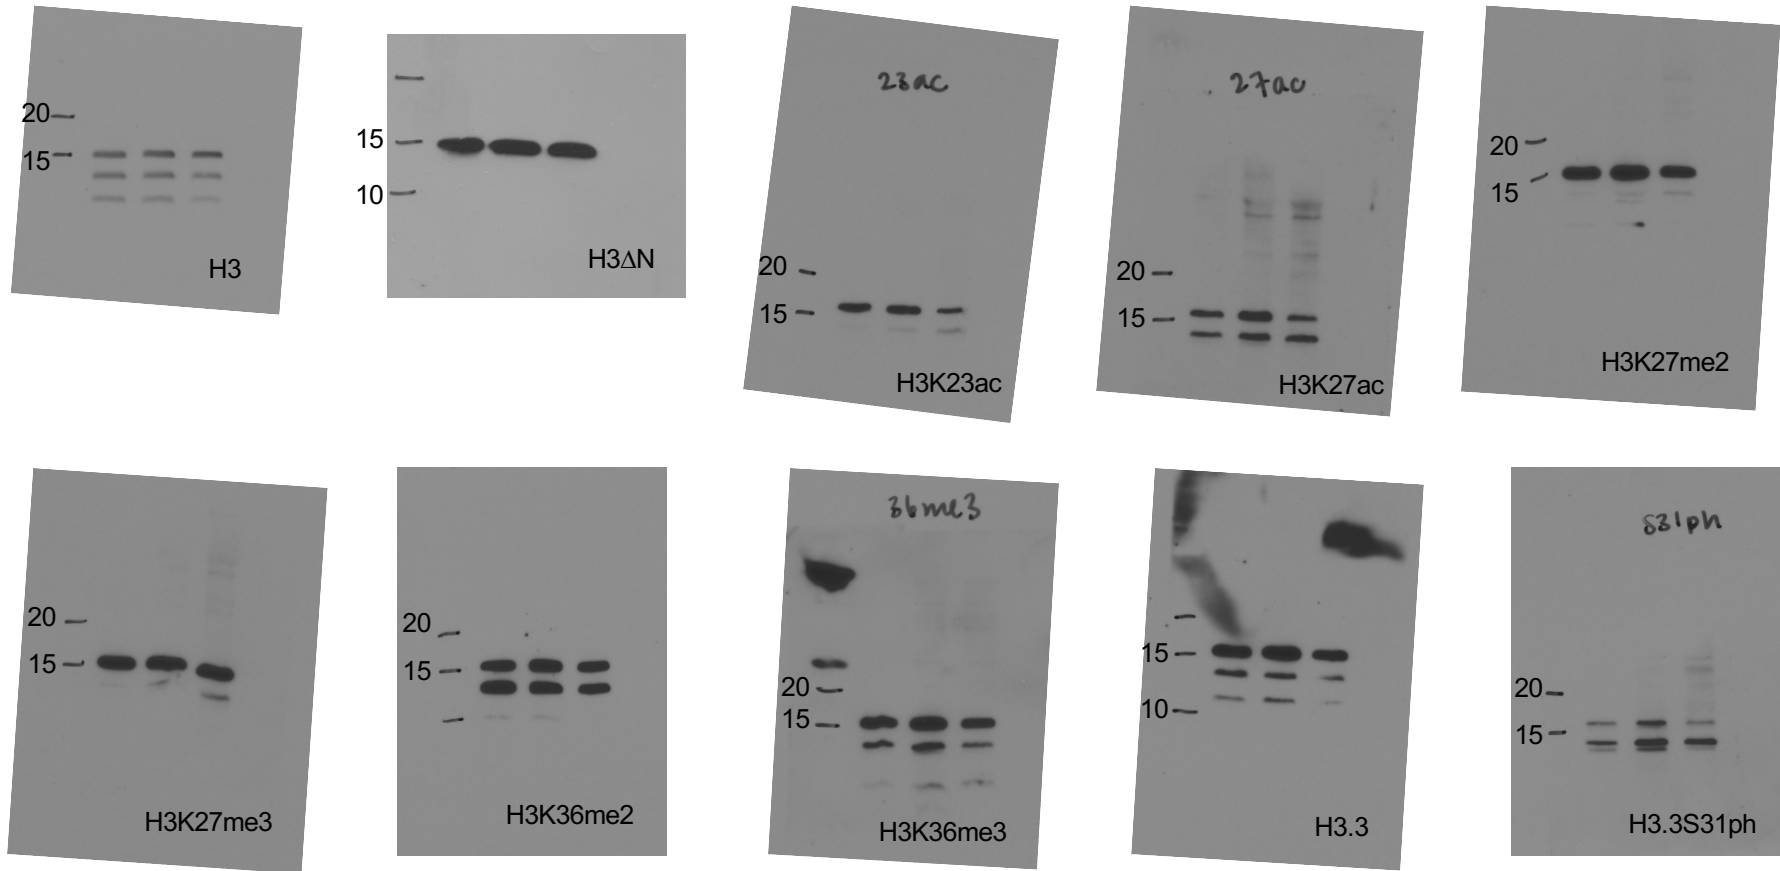

Supplement: NIHMS1690831-supplement-1690831_SD_ED_Fig__1.pdf [file NIHMS1690831-supplement-1690831_SD_ED_Fig__1.pdf]
