# Supplementary material
Source: PubMed Central journal article supplement (PMC8159908)

Extended Data Figure 4a

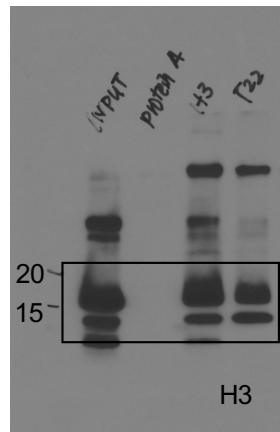

Extended Data Figure 4f

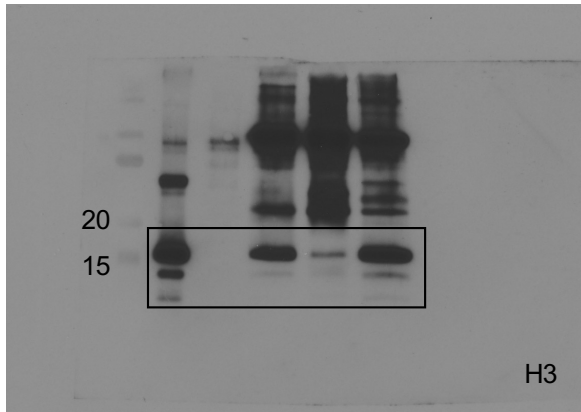

Supplement: NIHMS1690831-supplement-1690831_SD_ED_Fig_4.pdf [file NIHMS1690831-supplement-1690831_SD_ED_Fig_4.pdf]

Figure 1b

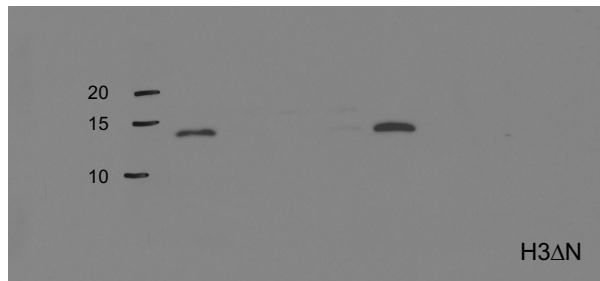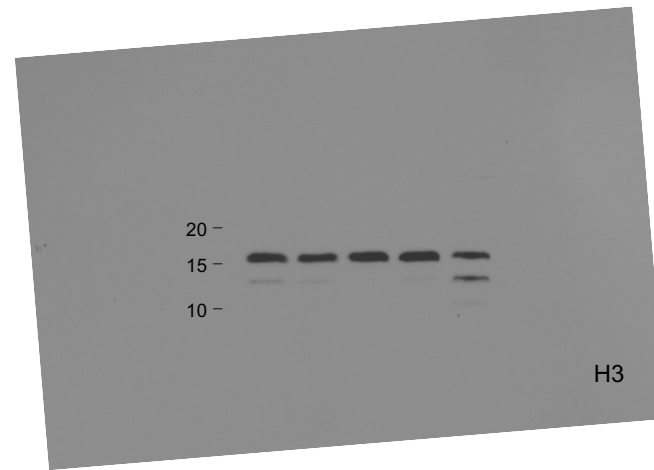

Figure 1c

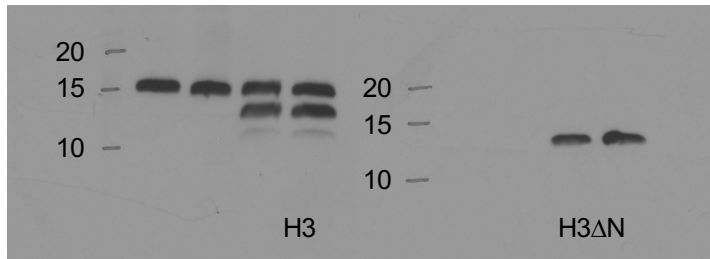

Figure 1d

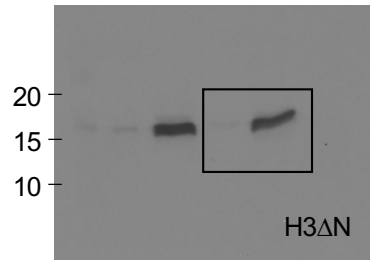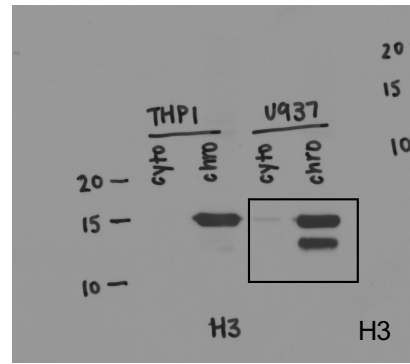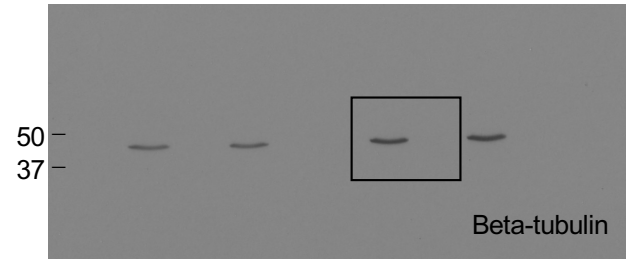

Figure 1e

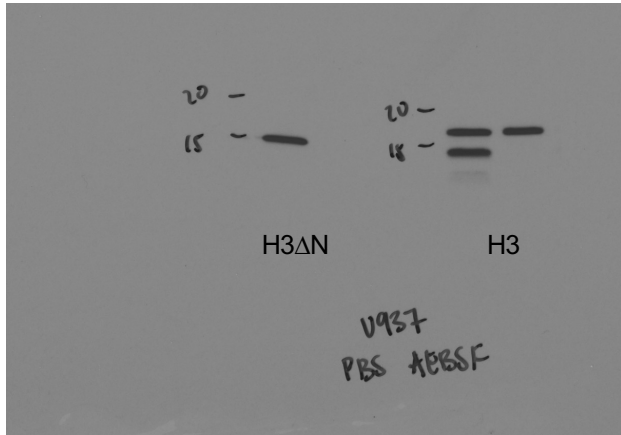

Figure 1g

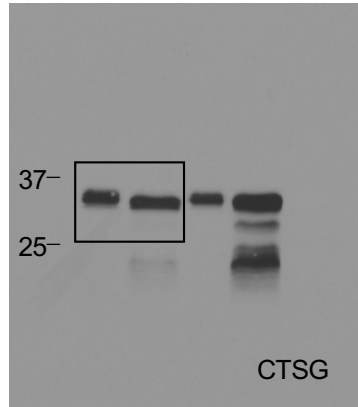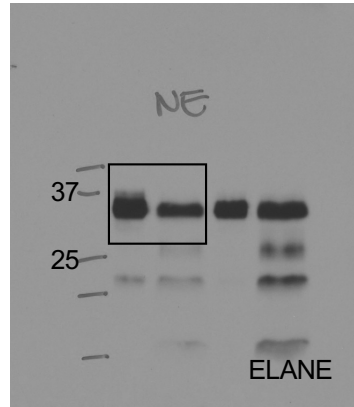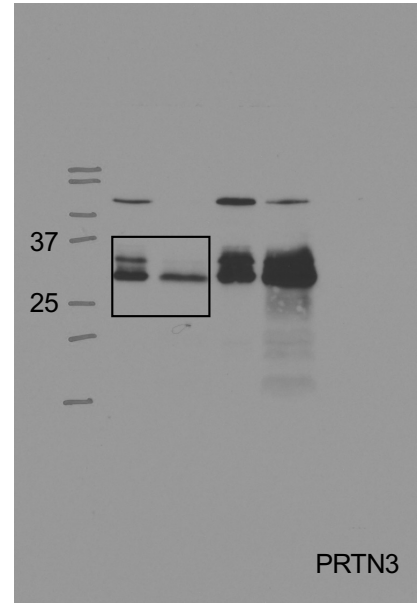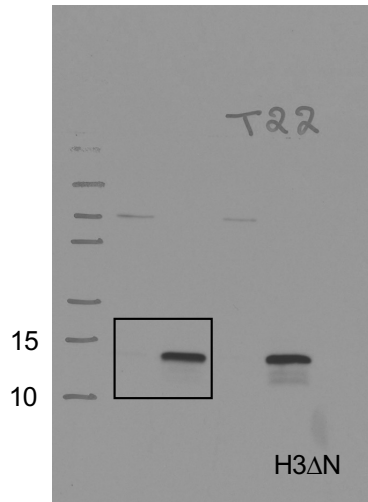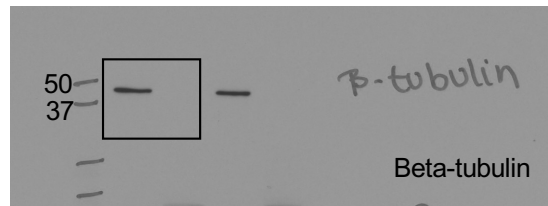

Figure 1h

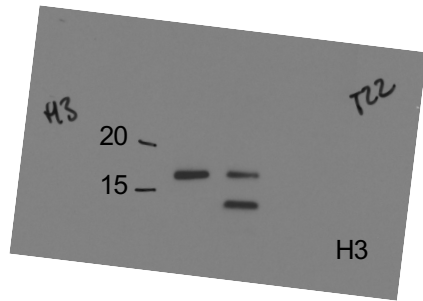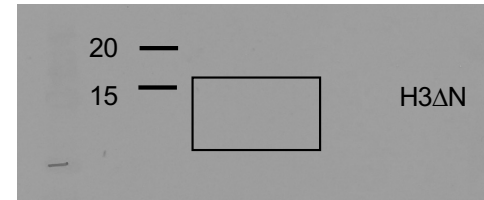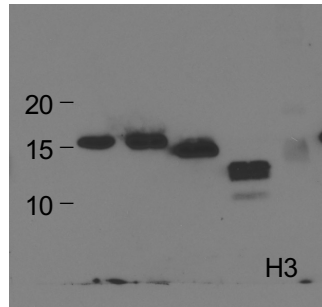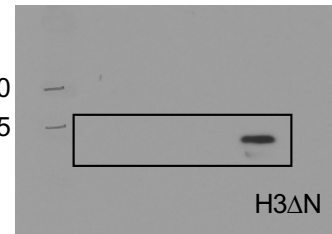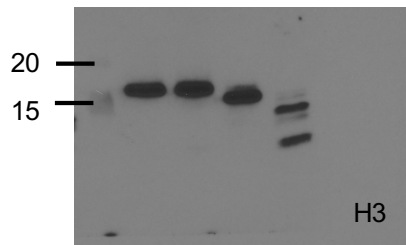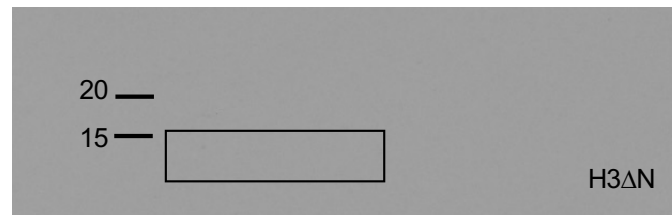

Supplement: NIHMS1690831-supplement-1690831_sourcedata__fig1.pdf [file NIHMS1690831-supplement-1690831_sourcedata__fig1.pdf]

Figure 2a

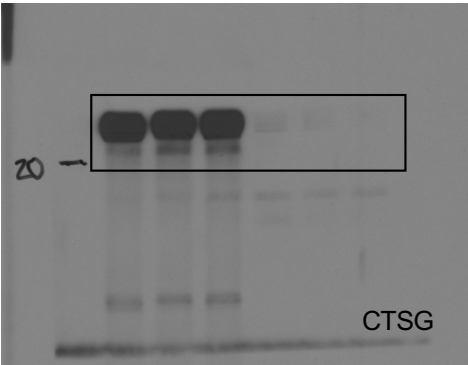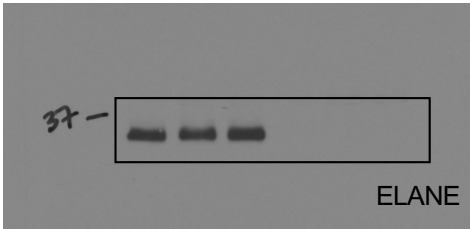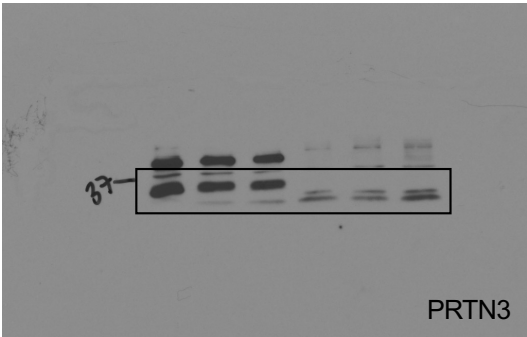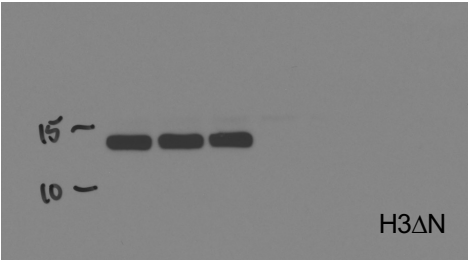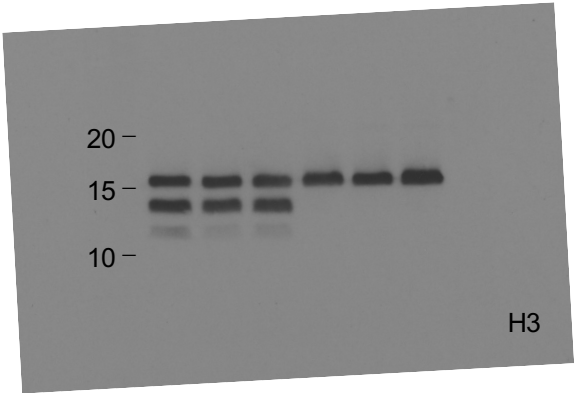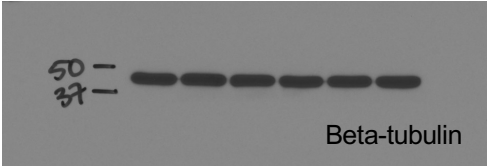

Supplement: NIHMS1690831-supplement-1690831_sourcedata_fig2.pdf [file NIHMS1690831-supplement-1690831_sourcedata_fig2.pdf]

Figure 3b

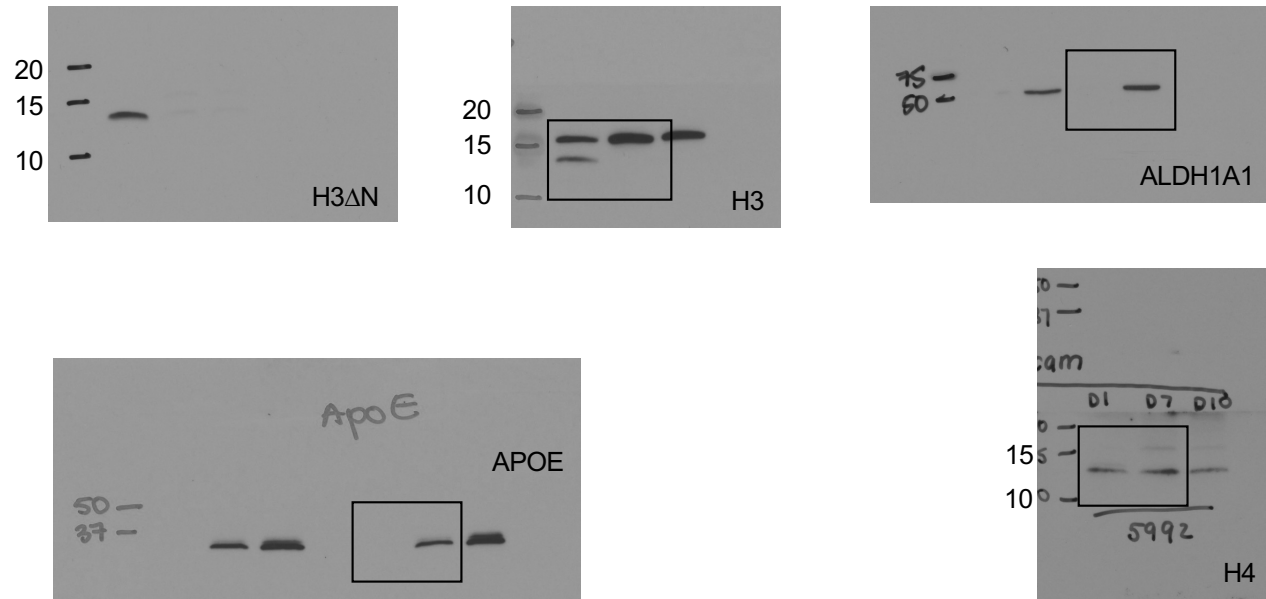

Figure 3d

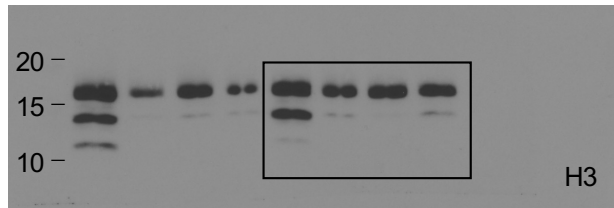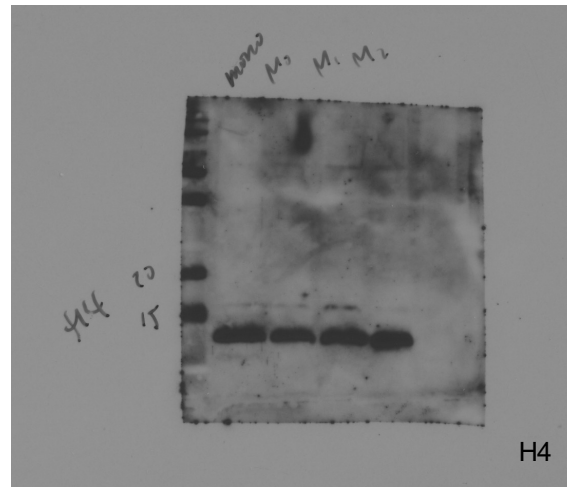

Figure 3e

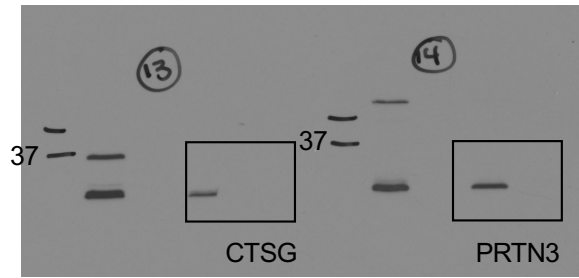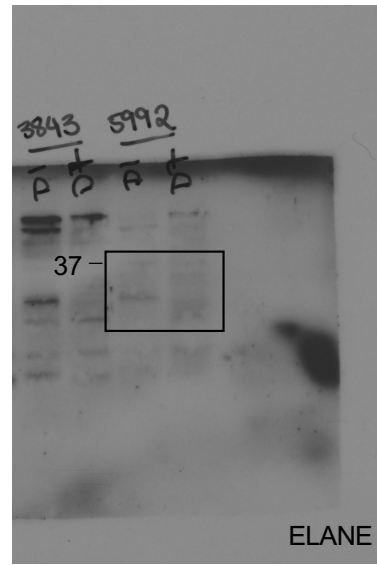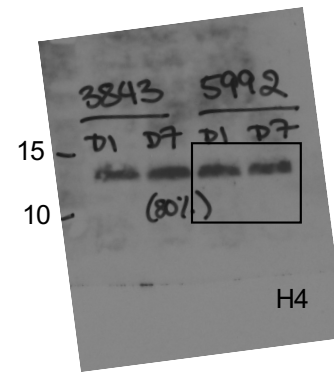

Figure 3g

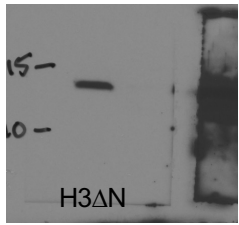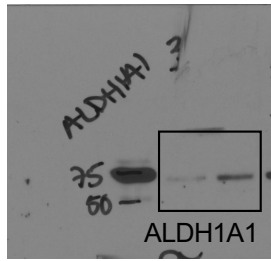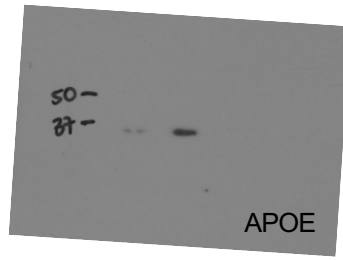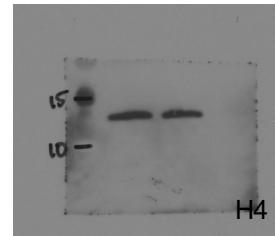

Supplement: NIHMS1690831-supplement-1690831_sourcedata_fig3.pdf [file NIHMS1690831-supplement-1690831_sourcedata_fig3.pdf]
